# Supplementary material for: Morphological dependence of silver electrodeposits investigated by changing the ionic liquid solvent and the deposition parameters
Source: Royal Society of Chemistry journal article supplement (doi:10.1039/c5cp06665d), 2016-01-01
Supplement: c5cp06665d1.pdf [file c5cp06665d1.pdf]

Electronic Supplementary Information

**Morphologic dependence of silver electrodeposits by changing the ionic liquid solvent and the deposition parameters: Experimental and modelling approaches**

Francisco A. A. Figueredo-Sobrinho,<sup>a</sup> Luis P. M. Santos,<sup>a</sup> Davi S. Leite,<sup>a</sup> Diego C. Craveiro,<sup>a</sup> Samir H. Santos,<sup>b</sup> Katlin I. B. Eguiluz,<sup>b</sup> Giancarlo R. Salazar-Banda,<sup>b</sup> Cleiton D. Maciel,<sup>c</sup> Maurício D. Coutinho-Neto,<sup>c</sup> Paula Homem-de-Mello,<sup>c</sup> Pedro de Lima-Neto<sup>a</sup> and Adriana N. Correia\*<sup>a</sup>

<sup>a</sup> *Departamento de Química Analítica e Físico-Química, Centro de Ciências, Universidade Federal do Ceará, Bloco 940 Campus do Pici, 60440-900, Fortaleza-CE, Brazil*

<sup>b</sup> *Instituto de Tecnologia e Pesquisa/Programa de Pós-Graduação em Engenharia de Processos, Universidade Tiradentes, CEP 49032-490, Aracaju-SE, Brazil*

<sup>c</sup> *ABCsIm, Centro de Ciências Naturais e Humanas, Universidade Federal do ABC, Avenida dos Estados, 5001, Bloco B, sala 1017, 09210-580, Santo André-SP, Brazil*

\* Author to whom all correspondence should be addressed.

E-mail address: [adriana@ufc.br](mailto:adriana@ufc.br)

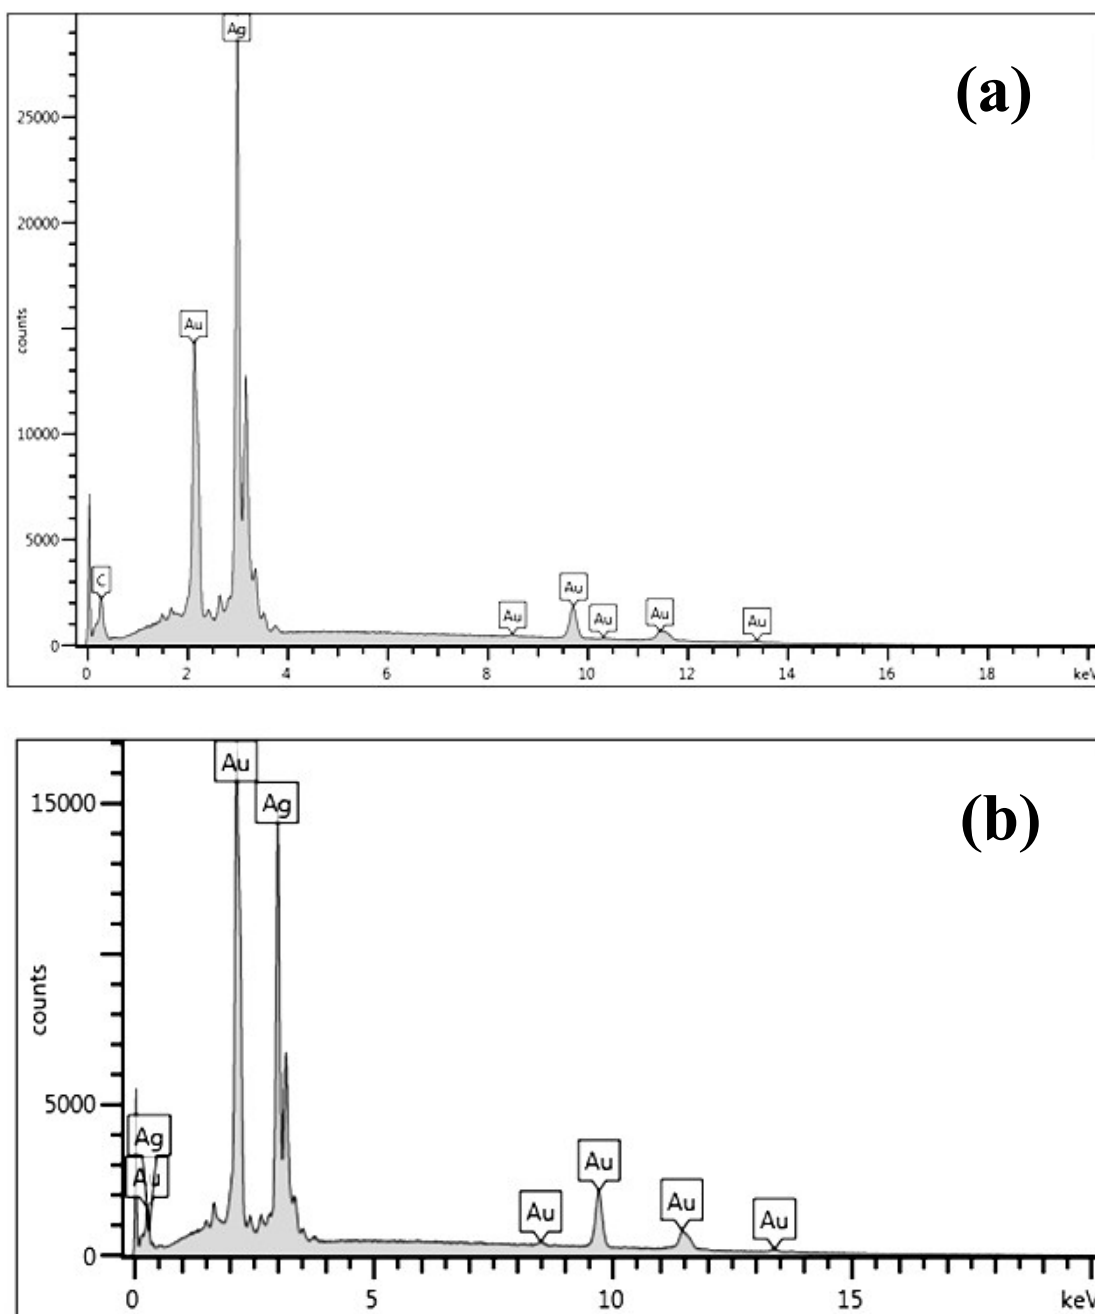

**Fig. S1:** EDS spectrum of Ag coatings obtained by galvanostatic deposition ( $30 \text{ mA cm}^{-2}$ ) from the ionic liquid (a) [EMIM]TfO containing  $50 \text{ mmol L}^{-1}$  AgTfO onto GC substrate at  $45 \text{ }^\circ\text{C}$  and (b) [HMIM<sup>+</sup>][HSO<sub>4</sub><sup>-</sup>] containing  $50 \text{ mmol L}^{-1}$  AgTfO onto GC substrate at  $30 \text{ }^\circ\text{C}$ .

EDS spectrum in Fig. S1(a-b) shows distinct peaks from Ag and Au confirming that the chemical compositions of coatings are made of Ag. Since the presence of Au peaks is due to the thin thickness of coatings. In Fig. S1(a), a small peak of C can also be observed, it is due to some residual IL.

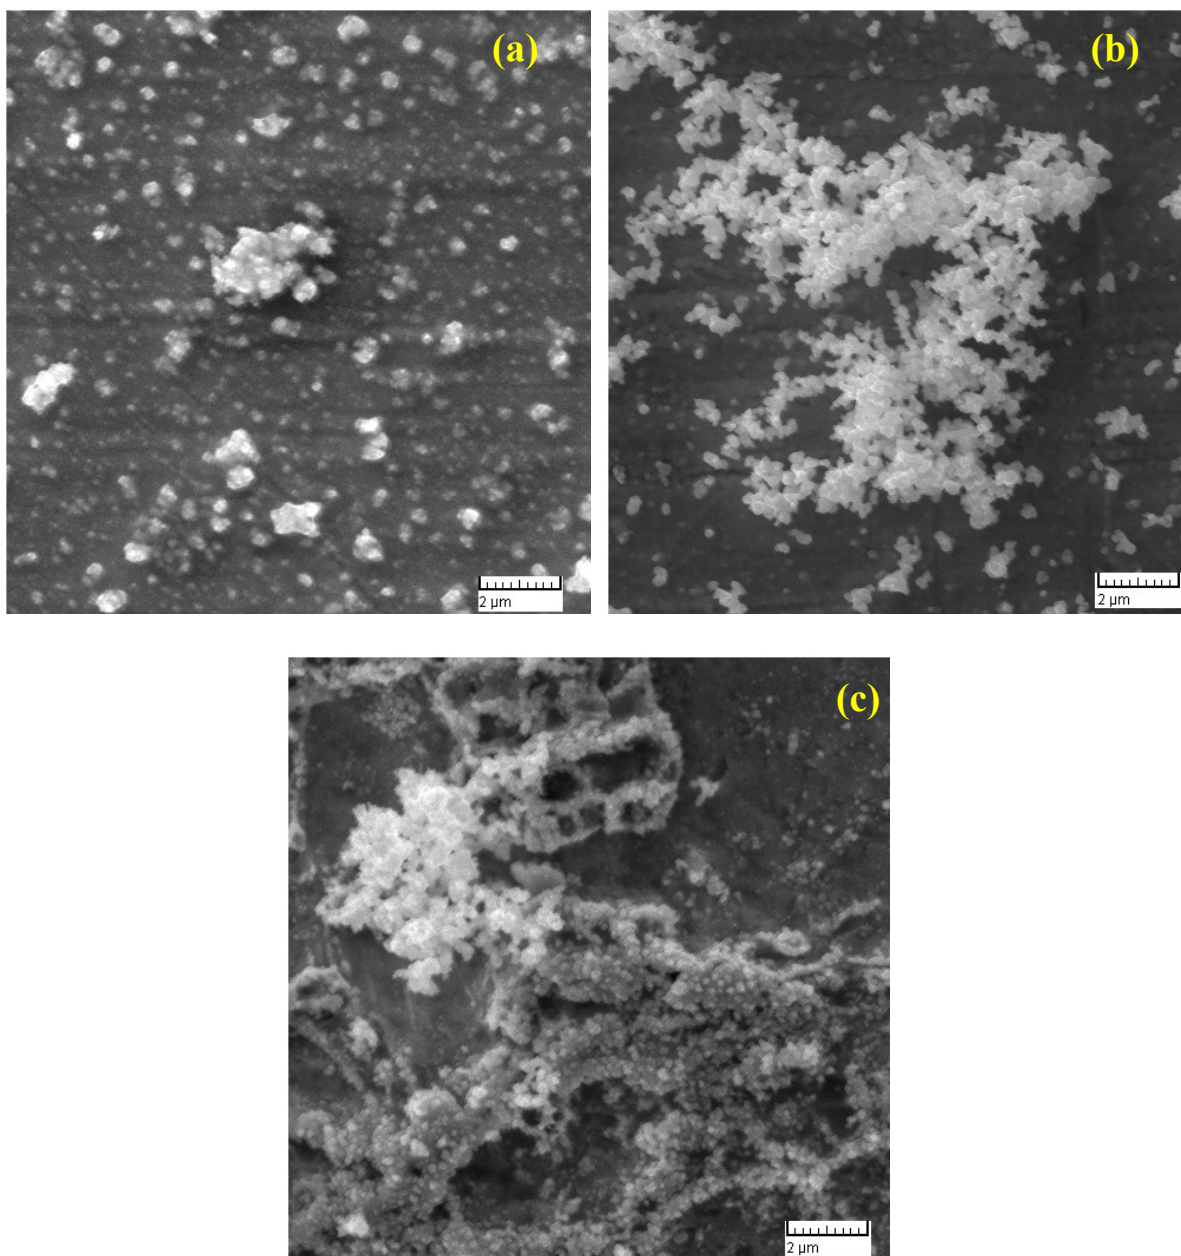

**Fig. S2:** SEM micrographs of Ag electrodeposits obtained by galvanostatic deposition ( $15 \text{ mA cm}^{-2}$ ) from the ionic liquid [EMIM]TfO containing  $50 \text{ mmol L}^{-1}$  AgTfO on gold substrate at (a)  $30$  and at (b)  $45$  °C, respectively, and (c) at  $30 \text{ mA cm}^{-2}$  at  $30$  °C.

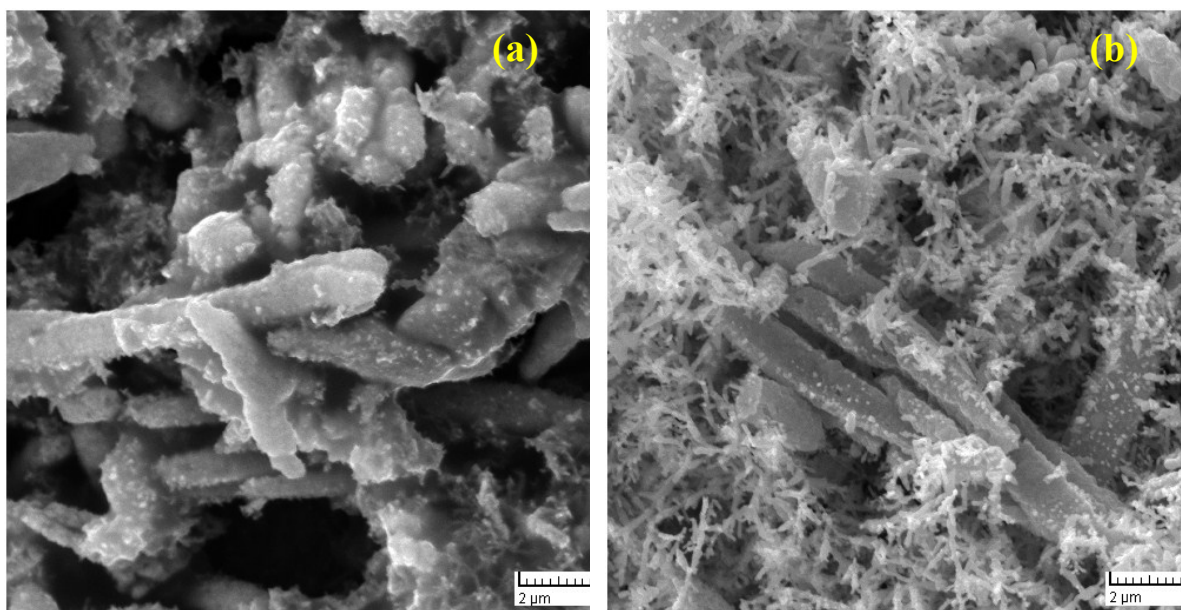

**Fig. S3:** SEM micrographs of Ag electrodeposits obtained by galvanostatic deposition from the ionic liquid [HMIM<sup>+</sup>][HSO<sub>4</sub><sup>-</sup>] containing 50 mmol L<sup>-1</sup> AgTfO on gold substrate at 45 °C at (a) 15 mA cm<sup>-2</sup> and at (b) 30 mA cm<sup>-2</sup>.

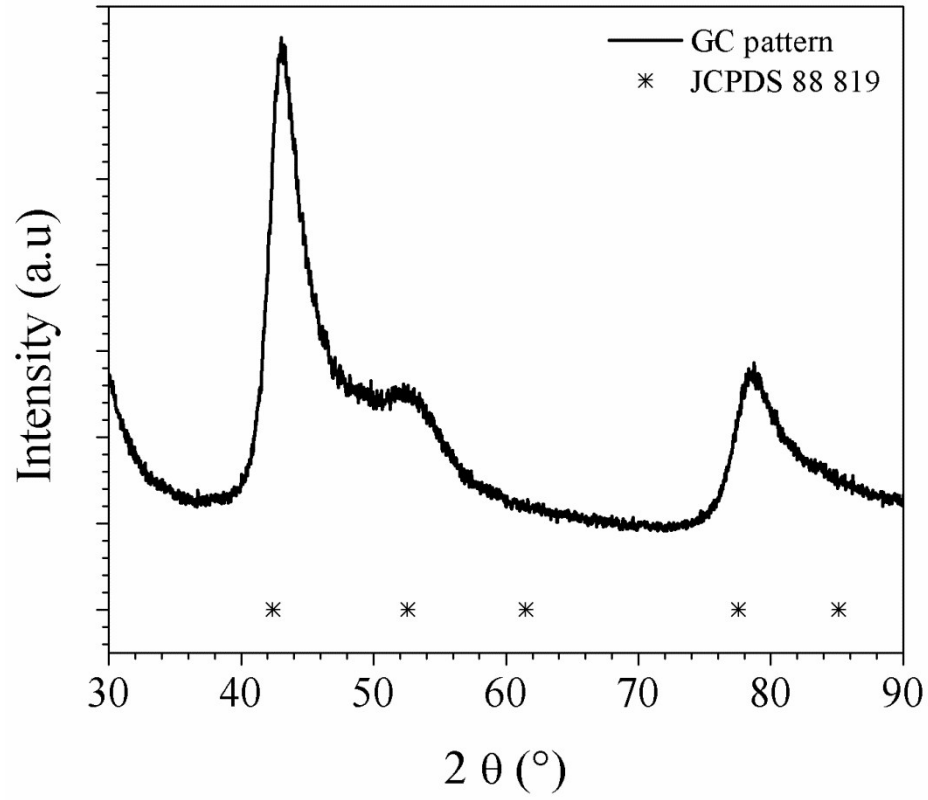

**Fig. S4:** XRD pattern taken for the GC substrate. Stars are related to the carbon peak positions.

**Table S1.** Coulomb ( $U_{\text{Coul}}$ ) and van der Waals ( $U_{\text{LJ}}$ ) components of the interaction energy between ionic liquid constituents.  $\Delta U_{\text{Coul}}$  and  $\Delta U_{\text{LJ}}$  terms correspond to energy differences between liquid with and without AgTfO ( $\Delta U = \Delta U_{\text{sol}} - \Delta U_{\text{pureliq}}$ ).  $\Delta U_{\text{Tot}} / n_{\text{Ag}^+}$  corresponds to total energy differences ( $\Delta U_{\text{Coul}} + \Delta U_{\text{LJ}}$ ) divided by the number of  $\text{Ag}^+$  ions. All values are given in  $\text{kJ mol}^{-1}$

|                                       | $\Delta U_{\text{Coul}}$ | $\Delta U_{\text{LJ}}$ | $\Delta U_{\text{Tot}} / n_{\text{Ag}^+}$ |
|---------------------------------------|--------------------------|------------------------|-------------------------------------------|
| $[\text{EMIM}]^+ - [\text{EMIM}]^+$   | -1268.7                  | 649.1                  | -12.4                                     |
| $[\text{EMIM}]^+ - [\text{TfO}]^-$    | -2942.0                  | -1096.3                | -80.8                                     |
| $[\text{TfO}]^- - [\text{TfO}]^-$     | 12111.5                  | -1515.6                | 211.9                                     |
| $[\text{EMIM}]^+ - [\text{Ag}]^+$     | 4661.4                   | -176.8                 | 89.7                                      |
| $[\text{TfO}]^- - [\text{Ag}]^+$      | -25395.0                 | 1693.2                 | -474.0                                    |
| $[\text{Ag}]^+ - [\text{Ag}]^+$       | 287.5                    | -0.9                   | 5.7                                       |
|                                       |                          |                        |                                           |
| $[\text{HMIM}]^+ - [\text{HMIM}]^+$   | -1533.4                  | 448.0                  | -36.2                                     |
| $[\text{HMIM}]^+ - [\text{HSO}_4]^-$  | 6178.0                   | 855.3                  | 234.4                                     |
| $[\text{HSO}_4]^- - [\text{HSO}_4]^-$ | 1919.6                   | -227.8                 | 56.4                                      |
| $[\text{HMIM}]^+ - [\text{Ag}]^+$     | 3947.1                   | -109.6                 | 127.9                                     |
| $[\text{HSO}_4]^- - [\text{Ag}]^+$    | -15490.9                 | 1002.7                 | -482.9                                    |
| $[\text{HMIM}]^+ - [\text{TfO}]^-$    | -7721.3                  | -1439.8                | -305.4                                    |
| $[\text{TfO}]^- - [\text{Ag}]^+$      | -619.8                   | 34.5                   | -19.5                                     |
| $[\text{HSO}_4]^- - [\text{TfO}]^-$   | 3090.2                   | -765.1                 | 77.5                                      |
| $[\text{Ag}]^+ - [\text{Ag}]^+$       | 75.6                     | -0.2                   | 2.5                                       |

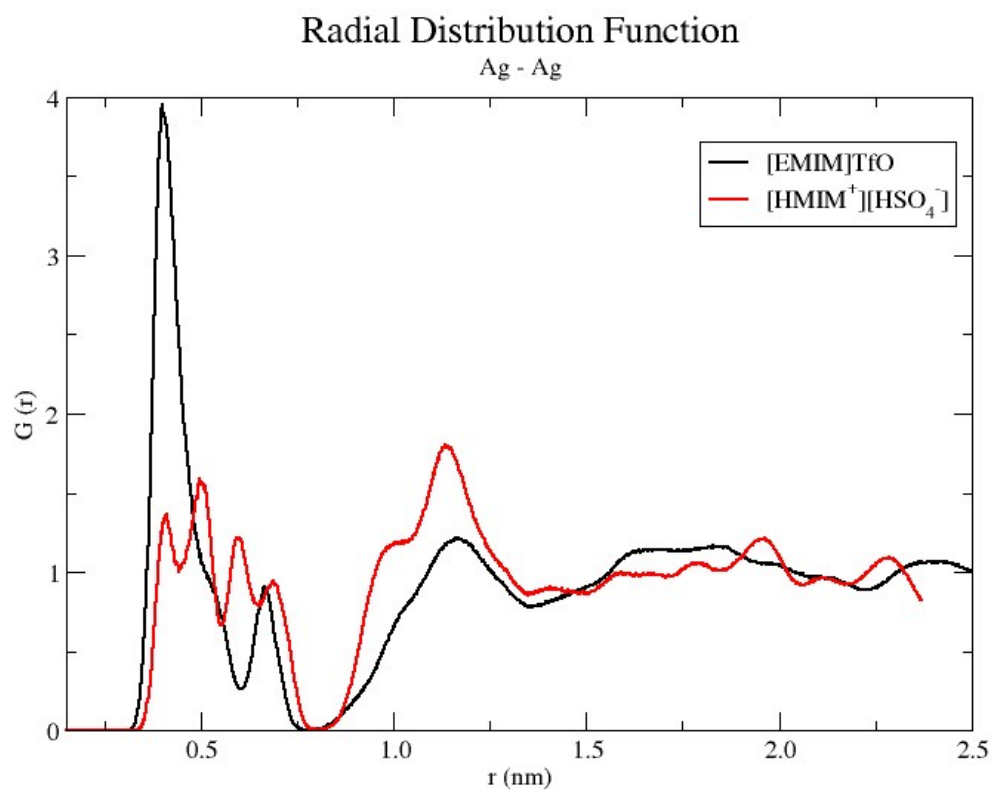

**Fig. S5:** Radial distribution function for Ag-Ag computed over 100 ns of simulation time. Red curve corresponds to Ag-[HMIM<sup>+</sup>][HSO<sub>4</sub><sup>-</sup>] and black curve corresponds to Ag-[EMIM<sup>+</sup>]TfO solutions.
